# Supplementary material for: Effects of nitrogen application on phytochemical component levels and anticancer and antioxidant activities of Allium fistulosum
Source: PeerJ. 2021 Jun 24;9:e11706. doi: 10.7717/peerj.11706 (PMC8236235; doi:10.7717/peerj.11706)
Supplement: Supplemental Information 1 [file peerj-09-11706-s001.xlsx]

## Sheet: Table 1
	Total phenolic content
		ABS	concentration（ug/mL）	ug/g	mg/100 g	Average（mg/100 g）
	N2	0.165	24.4737	244.737	24.4737	22.6645
		0.155	22.8289	228.289	22.8289
		0.149	21.8421	218.421	21.8421
		0.151	22.1711	221.711	22.1711
		0.152	22.3355	223.355	22.3355		SD
		0.152	22.3355	223.355	22.3355		0.5013
	N1	0.133	19.2105	192.105	19.2105	19.4298
		0.129	18.5526	185.526	18.5526
		0.141	20.5263	205.263	20.5263
		0.139	20.1974	201.974	20.1974
		0.129	18.5526	185.526	18.5526		SD
		0.135	19.5395	195.395	19.5395		0.46843
	N0	0.116	16.4145	164.145	16.4145	17.977
		0.118	16.7434	167.434	16.7434
		0.121	17.2368	172.368	17.2368
		0.124	17.7303	177.303	17.7303
		0.135	19.5395	195.395	19.5395		SD
		0.139	20.1974	201.974	20.1974		0.9812

## Sheet: Table 2
	Concentration (ug/mL)	Peak area
Quercetin	200	4489955
	100	2259323
	50	1152703
	10	231068
	Concentration (ug/mL)	Peak area
Kaempferol	200	8505428
	100	3992240
	50	1955541
	10	391502
	Concentration (ug/mL)	Peak area
Quercetin-3-β-D-glucoside	200	5579777
	100	2794098
	50	1306260
	10	294957
		Quercetin-3-β-D-glucoside
		Peak area	Concentration (ug/mL)	g/g dry weight	mg/100 g dry weight		Average（mg/100 g）	SD
N0	trial1	108935	4.86785	0.00131432	131.432		159.7	16.38
	trial2	138045	5.90701	0.00159489	159.489
	trial3	167811	6.96959	0.00188179	188.179
N1	trial1	837204	30.8654	0.00925962	925.962		760.01	86.52
	trial2	644379	23.982	0.00719459	719.459
	trial3	565145	21.1535	0.00634605	634.605
N2	trial1	308511	11.9923	0.00395744	395.744		468.97	64.43
	trial2	323803	12.5381	0.00413759	413.759
	trial3	479702	18.1034	0.00597412	597.412

## Sheet: Table 3
ABTS
				Scavenging ability （%）
		Concentration（mg/mL）	trial 1	trial 2	trial 3	trial 4	trial 5	trial 6
	Ascorbic acid	0.01	0.1425	0.1432	0.1439	0.1821	0.1794	0.1767			trial (1-3) IC50			trial (4-6) IC50
		0.02	0.2976	0.3029	0.3082	0.3189	0.3213	0.3237			0.04	0.08		0.04	0.08
		0.04	0.3934	0.4075	0.4216	0.4152	0.4131	0.411			0.4075	0.7298	IC50	0.4131	0.7412	IC50	Average IC50	SD
		0.08	0.7247	0.7298	0.7349	0.7367	0.7412	0.7457			y = 8.0575x + 0.0852		51.48	y = 8.2025x + 0.085		50.5943	51.04	0.45
		0.1	0.814	0.819	0.8299	0.8371	0.846	0.8398	Avearage	SD
			0.820967			0.840967			0.830967	1
	N2	0.01	0.1178	0.1199	0.122	0.1278	0.1311	0.1344
		0.02	0.2356	0.2376	0.2396	0.2423	0.2452	0.2481			trial (1-3) IC50			trial (4-6) IC50
		0.04	0.3478	0.3498	0.3518	0.3634	0.3654	0.3674			0.04	0.08		0.04	0.08		Average IC50	SD
		0.08	0.6456	0.6428	0.64	0.687	0.681	0.675			0.3498	0.6428	60.5188	0.3654	0.681	57.0596	58.79	1.73
		0.1	0.7989	0.7956	0.7953	0.8292	0.8242	0.8162	Avearage	SD	y = 7.325x + 0.0568			y = 7.89x + 0.0498
			0.7966			0.8232			0.8099	1.33
	N1	0.01	0.0789	0.0879	0.0969	0.1076	0.1097	0.1118
		0.02	0.1678	0.1688	0.1698	0.1737	0.1756	0.1775			trial (1-3) IC50			trial (4-6) IC50
		0.04	0.3145	0.3189	0.3233	0.2612	0.2675	0.2738			0.04	0.08		0.04	0.08
		0.08	0.5887	0.5931	0.5975	0.5595	0.5563	0.5631			0.3189	0.5931		0.2675	0.5563		Average IC50	SD
		0.1	0.6167	0.6196	0.6225	0.6134	0.6242	0.635	Avearage	SD	y = 6.855x + 0.0447		66.4187	y = 7.22x - 0.0213		72.2022	69.31	2.89
			0.6196			0.6242			0.6219	0.23
	N0	0.01	0.1456	0.1482	0.1508	0.1045	0.114	0.1235			trial (1-3) IC50			trial (4-6) IC50
		0.02	0.1587	0.1632	0.1677	0.1513	0.1524	0.1535			0.04	0.08		0.04	0.08
		0.04	0.2254	0.2279	0.2304	0.2532	0.2551	0.257			0.2279	0.4923		0.2551	0.5321		Average IC50	SD
		0.08	0.4889	0.4923	0.4957	0.5309	0.5321	0.5333			y = 6.61x - 0.0365		81.18	y = 6.925x - 0.0219		75.3646	78.27	2.9
		0.1	0.5653	0.5699	0.5745	0.5765	0.5789	0.5813	Avearage	SD
			0.5699			0.5789			0.5744	0.45

## Sheet: Table 4
DPPH:
			Scavenging ability （%）
		Concentration（mg/mL）	trial 1	trial 2	trial3	trial 4	trial 5	trial 6			trial (1-3) IC50			trial (4-6) IC50
	Gallic acid	0.01	0.1441	0.1444	0.1447	0.1594	0.160386	0.1675			0.04	0.08	IC50	0.04	0.08	IC50
		0.02	0.3817	0.3822	0.3847	0.3849	0.406213	0.4112			0.4012	0.8615		0.472855	0.853865		Average IC50	SD
		0.04	0.4005	0.4012	0.4019	0.4719	0.472855	0.4739			y = 11.508x - 0.0591		48.5836	y = 9.5252x + 0.0918		42.8547	45.72	2.86
		0.08	0.8603	0.8615	0.8627	0.8529	0.853865	0.8549
		0.1	0.8634	0.8694	0.8724	0.8796	0.879711	0.8798	Avearage	SD
			0.8684			0.879704			0.874052	0.57
	N2	0.01	0.1116	0.1119	0.1121	0.1154	0.129914	0.1301
		0.02	0.3312	0.3256	0.3301	0.2945	0.296566	0.3101			trial (1-3) IC50			trial (4-6) IC50
		0.04	0.401	0.4006	0.4002	0.4002	0.400408	0.4006			0.04	0.08		0.04	0.08
		0.08	0.7529	0.7534	0.7539	0.79	0.790681	0.7914			0.4006	0.7534		0.400408	0.790681		Average IC50	SD
		0.1	0.7943	0.7942	0.7949	0.8477	0.847817	0.8484	Avearage	SD	y = 8.82x + 0.0478		51.2698	y = 9.7568x + 0.0101		50.2111	50.74	0.53
			0.794467			0.847972			0.82122	2.68
	N1	0.01	0.0791	0.0805	0.0798	0.0989	0.0990413	0.1001
		0.02	0.1488	0.1499	0.1496	0.1649	0.165261	0.1678			trial (1-3) IC50			trial (4-6) IC50
		0.04	0.3411	0.3419	0.3415	0.2801	0.280666	0.2813			0.04	0.08		0.04	0.08
		0.08	0.563	0.5634	0.5632	0.6229	0.6232	0.6235			0.3415	0.5632		0.280666	0.6232		Average IC50	SD
		0.1	0.6721	0.6701	0.6711	0.6934	0.693939	0.6951	Avearage	SD	y = 5.5425x + 0.1198		68.5972	y = 8.5633x - 0.0619		65.6172	67.11	1.49
			0.6711			0.694146			0.682623	1.15
	N0	0.01	0.0761	0.0767	0.0781	0.0801	0.0794713	0.0783			trial (1-3) IC50			trial (4-6) IC50
		0.02	0.1211	0.1242	0.1301	0.1346	0.137765	0.1356			0.08	0.1		0.08	0.1
		0.04	0.2373	0.2378	0.2383	0.185	0.185374	0.1858			0.3946	0.5921		0.429078	0.596817		Average IC50	SD
		0.08	0.3944	0.3946	0.3948	0.4288	0.429078	0.4294			y = 9.875x - 0.3954		90.6734	y = 8.387x - 0.2419		88.4583	89.57	1.11
		0.1	0.5915	0.592	0.5929	0.5963	0.596617	0.5978	Avearage	SD
			0.592133			0.596906			0.594519	0.24

## Sheet: Figure 2
	Hela cells
			Concentration （ug/mL）	Cell viability（%）				Average	SD
				trial 1	trial 2	trial3	trial 4
		N0	5-Fu	63.0035	58.9903	59.536	54.2169	58.9367	3.12961
			100	98.0608	93.7809	93.7314	92.1738	94.4367	2.18987
			200	94.2379	98.4947	97.0916	97.3905	96.8037	1.57083
			400	77.5116	80.7241	83.9434	73.8019	78.9952	3.76316
		N1	5-Fu	63.0035	58.9903	59.536	54.2169	58.9367	3.12961
			100	70.6848	72.1772	79.1679	75.2521	74.3205	3.2472
			200	72.8574	71.8513	76.2426	68.9201	72.4679	2.61568
			400	78.6923	73.9368	76.0276	70.299	74.7389	3.06784
		N2	5-Fu	63.0035	58.9903	59.536	54.2169	58.9367	3.12961
			100	72.0014	74.6609	78.8229	67.8358	73.3302	3.9967
			200	69.138	70.3838	73.8324	65.975	69.8323	2.8136
			400	74.0825	73.2464	76.2776	67.693	72.8249	3.16295
	HepG2 cells
			Concentration （ug/mL）	Cell viability（%）				Average	SD
				trial 1	trial 2	trial3	trial 4
		N0	5-Fu	73.6414	74.2664	73.0261	71.8484	73.1956	0.89289
			100	92.8652	106.43	91.3043	92.8478	95.8618	6.1342
			200	85.7949	96.9842	98.7936	89.0844	92.6643	5.3906
			400	93.4753	91.5753	94.6364	87.4787	91.7914	2.71917
		N1	5-Fu	73.6414	74.2664	73.0261	71.8484	73.1956	0.89289
			100	83.8971	82.4422	88.3302	82.0528	84.1806	2.49243
			200	91.7987	98.9861	95.322	97.4103	95.8793	2.69064
			400	86.6333	87.3152	86.3659	83.6712	85.9964	1.38636
		N2	5-Fu	73.6414	74.2664	73.0261	71.8484	73.1956	0.89289
			100	81.7959	82.5267	76.8098	80.3407	80.3683	2.20001
			200	78.0787	76.1772	78.404	77.0832	77.4358	0.874533
			400	82.2507	81.7391	82.0187	82.1013	82.0275	0.186079
